# Supplementary material for: The regulatory roles of metal ions (M+/2+= Li+, Na+, K+, Be2+, Mg2+, and Ca2+) and water molecules in stabilizing the zwitterionic form of glycine derivatives
Source: Royal Society of Chemistry journal article supplement (doi:10.1039/b509496h), 2005-01-01
Supplement: b509496h.pdf [file b509496h.pdf]

# Electronic Supplementary Information (ESI):

## The Regulation Roles of Metal ions ( $M^{+/2+} = Li^+, Na^+, K^+, Be^{2+}, Mg^{2+},$ and $Ca^{2+}$ ) and Water Molecules in Stabilizing the Zwitterionic Form of Glycine Derivatives

Hongqi Ai <sup>a,b</sup>, Yuxiang Bu <sup>b,c\*</sup>, Ping Li <sup>b</sup>, Chong Zhang <sup>b,d</sup>

<sup>a</sup> School of Chemistry and Chemical Engineering, Jinan University, Jinan, 250022, P.R. China

<sup>b</sup> Institute of Theoretical Chemistry, Shandong University, Jinan, 250100, P. R. China

<sup>c</sup> Department of Chemistry, Qufu Normal University, Qufu, 273165, P. R. China

<sup>d</sup> Department of chemistry and technology, Liaocheng University, Liaocheng, 252059, P. R. China

E-mail: byx@sdu.edu.cn

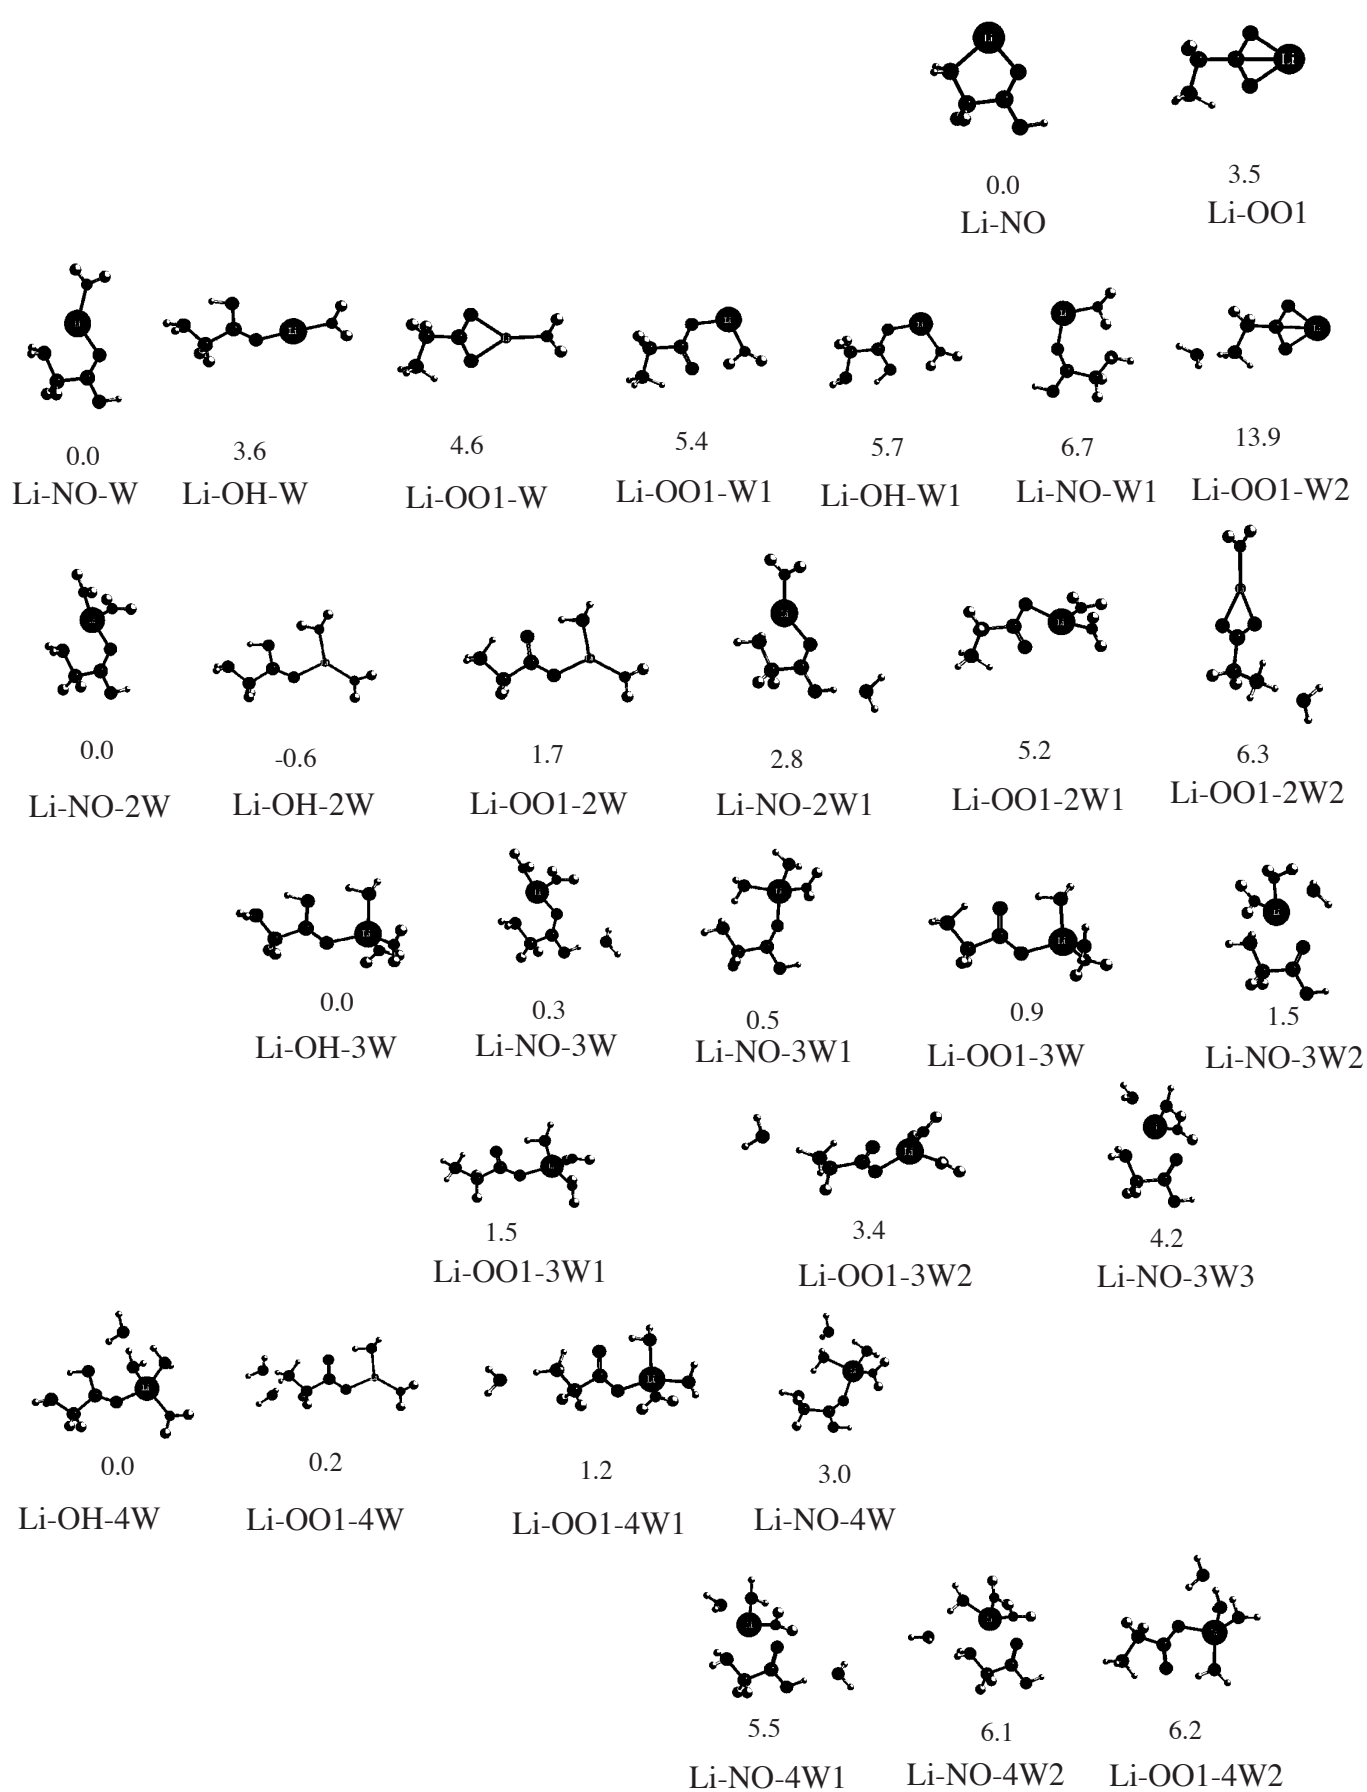

Fig. S1 HF/6-31G\*-optimized geometries of NO/OO/OH-mode glycine-Li<sup>+</sup> complexes and their (mono-tetra)hydrates. The relative energies (in kcal mol<sup>-1</sup>) under each complex are obtained at the B3LYP/6-311+G\*\*//HF/6-31G\* level with the ZPVE corrections, respectively.

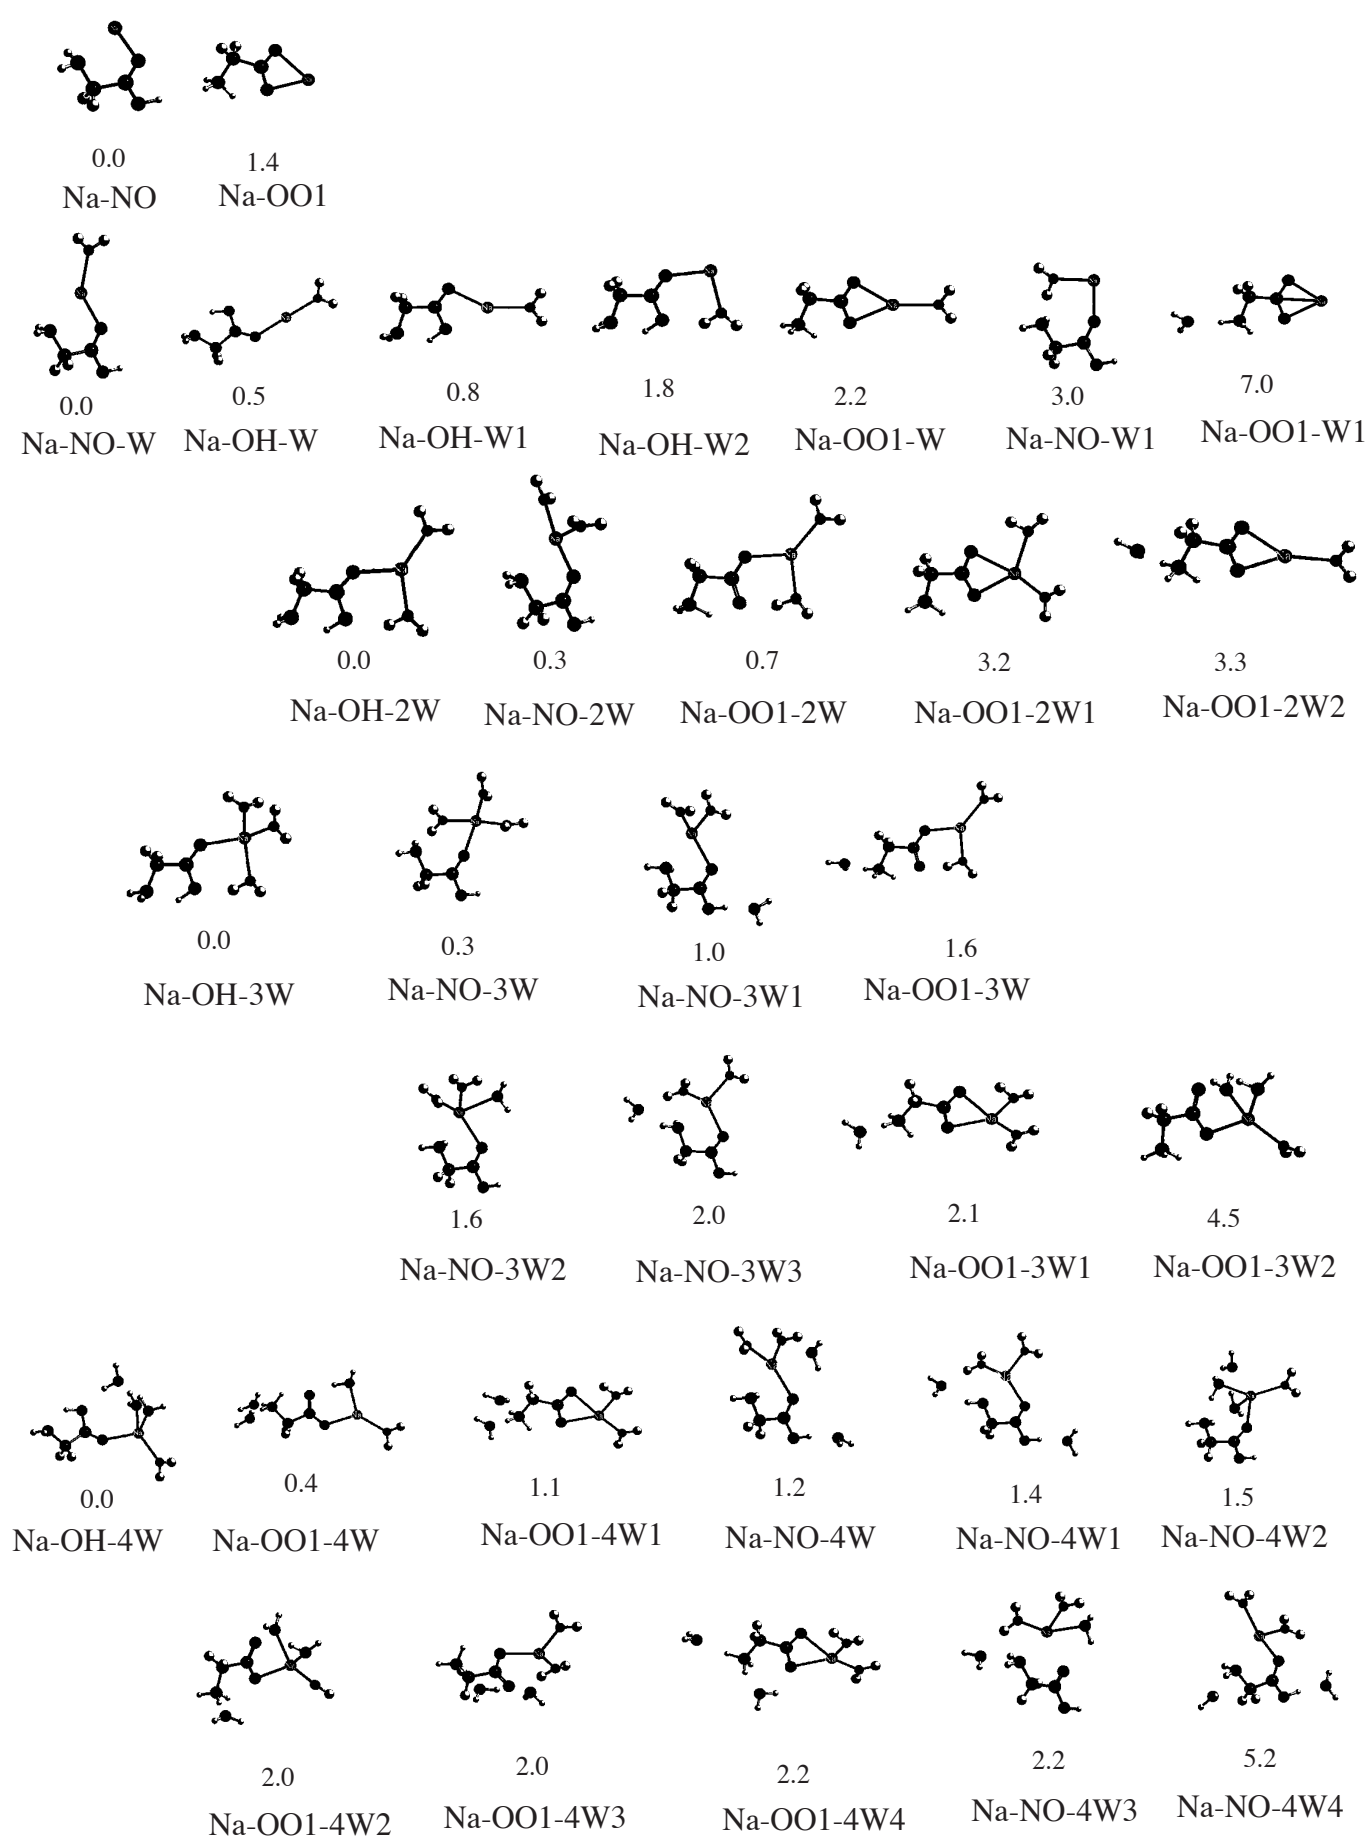

Fig. S2. HF/6-31G\*-optimized geometries of NO/OO/OH-mode glycine-Na<sup>+</sup> complexes and their (mono-tetra)hydrates. The relative energies (in kcal mol<sup>-1</sup>) under each complex are obtained at the B3LYP/6-311+G\* //HF/6-31G\* level with the ZPVE corrections.

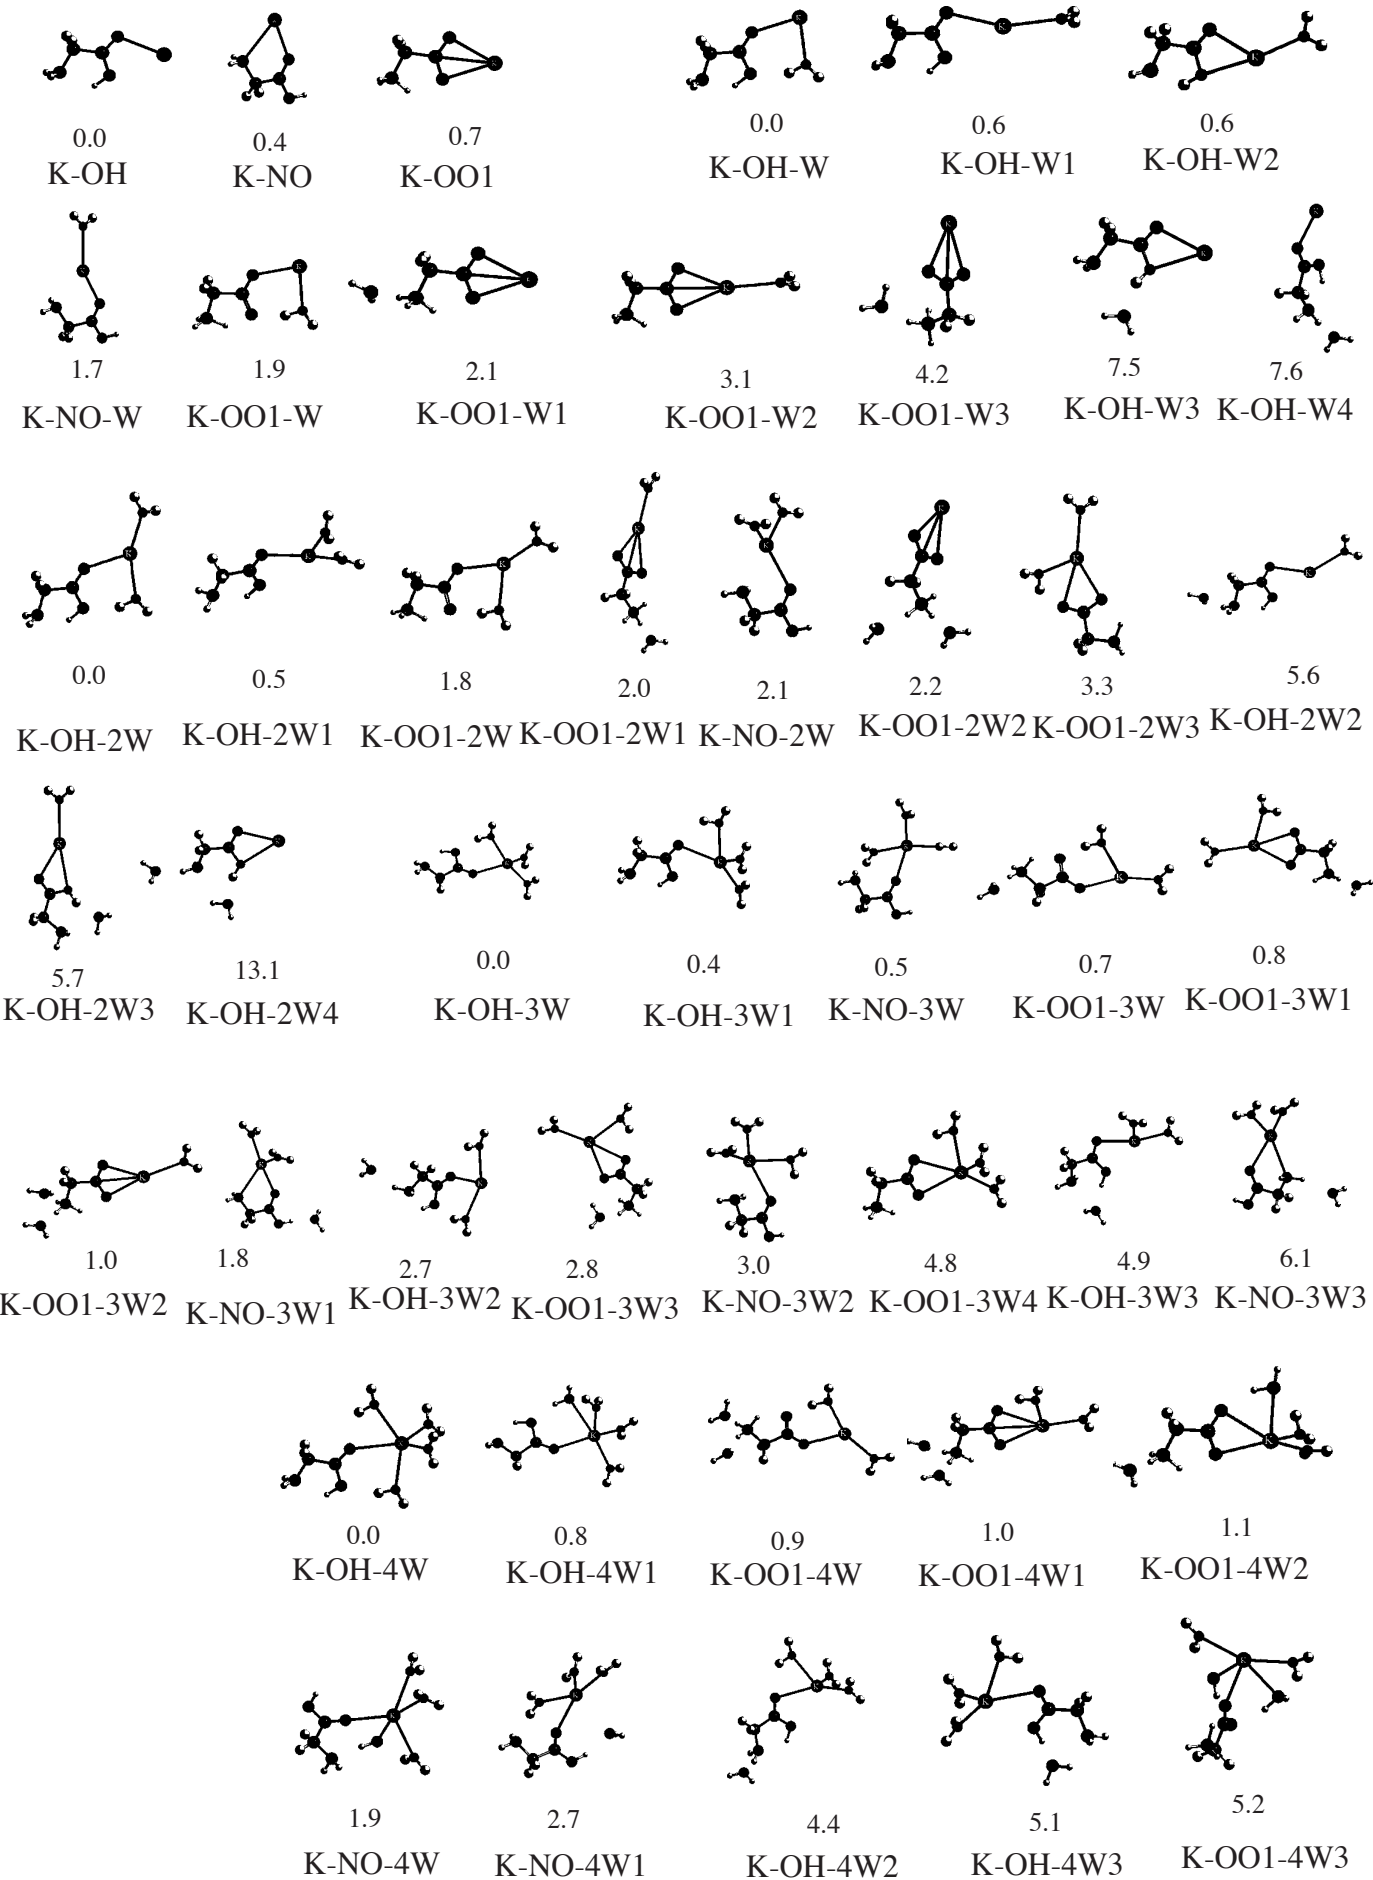

Fig. S3 HF/6-31G\*-optimized geometries of OH/NO/OO-mode glycine-K<sup>+</sup> complexes and their (mono-tetra)hydrates. The relative energies (in kcal mol<sup>-1</sup>) under each complex are obtained at the B3LYP/6-311+G\* //HF/6-31G\* level with the ZPVE corrections.

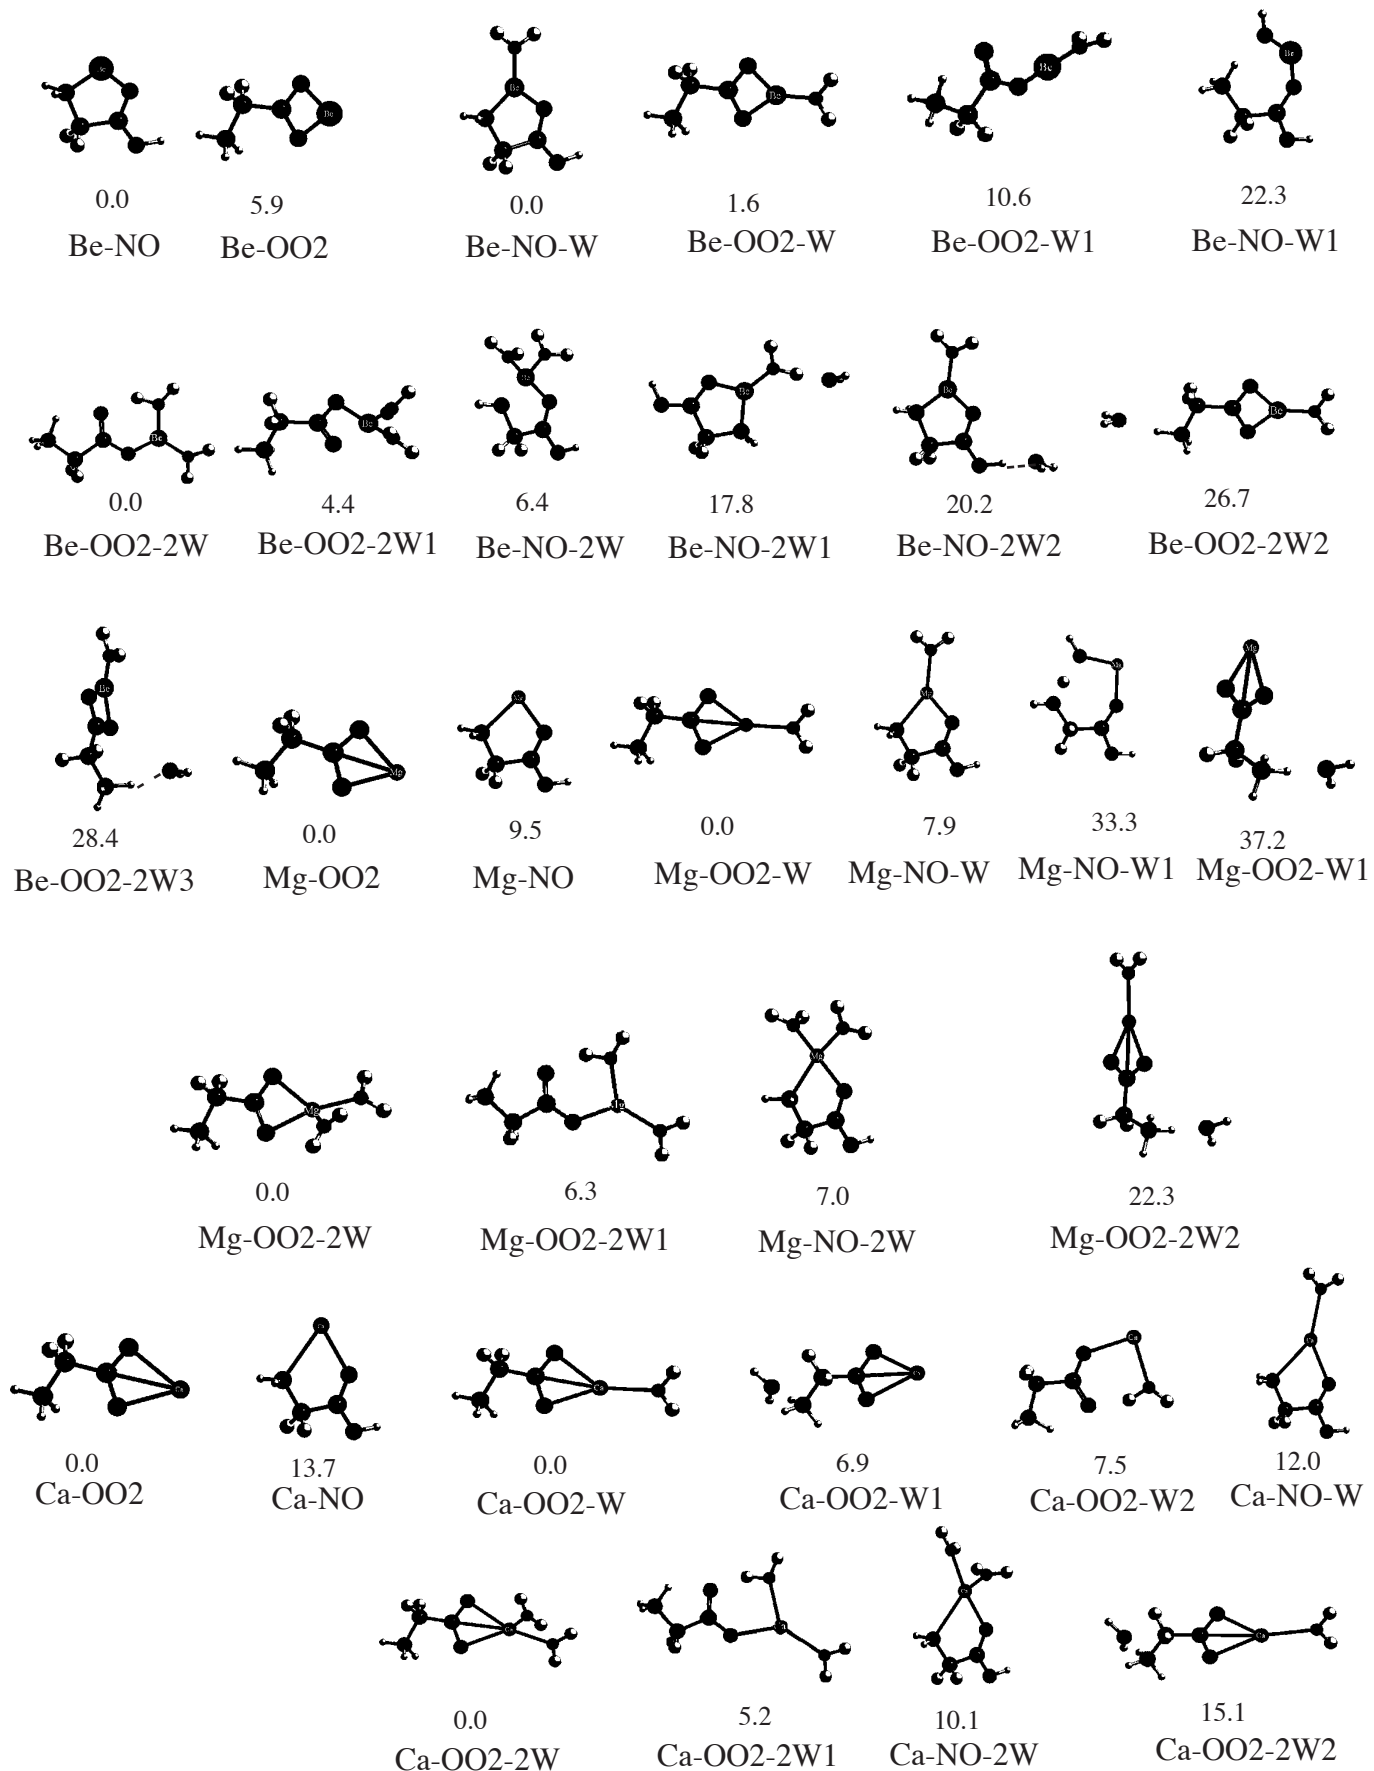

Fig. S4 HF/6-31G\*-optimized geometries of NO/OO-mode glycine-Be<sup>2+</sup>/Mg<sup>2+</sup>/Ca<sup>2+</sup> complexes and their (mono-di)hydrates. The relative energies (in kcal mol<sup>-1</sup>) under each complex are obtained at the B3LYP/6-311+G\* //HF/6-31G\* level with the ZPVE corrections.

Table S1 B3LYP/6-31(d,p)-optimized NBO charge populations over each metal ion in these different complexes

| Complexes     | Li <sup>+</sup> | Na <sup>+</sup> | K <sup>+</sup> | Be <sup>2+</sup> | Mg <sup>2+</sup> | Ca <sup>2+</sup> |
|---------------|-----------------|-----------------|----------------|------------------|------------------|------------------|
| M-NO/OO/OH    | 0.94/0.94/0.96  | 0.95/0.94/0.96  | 0.97/0.97/0.98 | 1.76/1.76/-      | 1.82/1.80/-      | 1.92/1.91/-      |
| M-NO/OO/OH-W  | 0.88/0.89/0.92  | 0.92/0.92/0.94  | 0.96/0.97/0.97 | 1.68/1.68/-      | 1.78/1.77/-      | 1.90/1.89/-      |
| M-NO/OO/OH-2W | 0.84/0.87/0.88  | 0.90/0.92/0.92  | 0.94/0.95/0.96 | 1.67/1.68/-      | 1.74/1.75/-      | 1.87/1.86/-      |
| M-NO/OO/OH-3W | 0.84/0.82/0.83  | 0.90/0.91/0.90  | 0.94/0.95/0.94 |                  |                  |                  |
| M-NO/OO/OH-4W | 0.83/0.86/0.83  | 0.89/0.91/0.89  | 0.93/0.95/0.92 |                  |                  |                  |
